# Supplementary material
Source: PubMed Central journal article supplement (PMC1553200)
Supplement: 7601259s1.pdf [file 7601259s1.pdf]

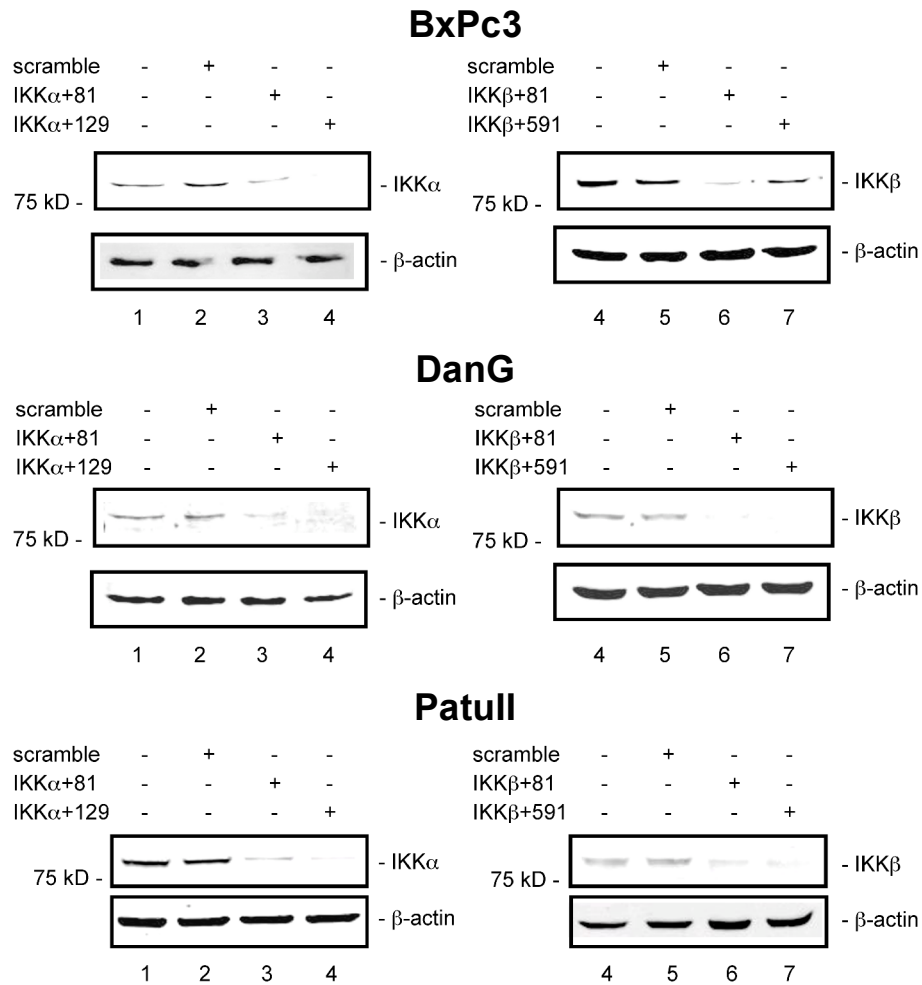

Western blots of IKK $\alpha$  and IKK $\beta$  protein levels in BxPc3, DanG and Patull cells transfected with the indicated siRNAs 48 hours post-transfection compared to untransfected or control siRNA transfected cells. The membrane was stripped and probed for  $\beta$ -actin to control equal protein loading.
