# Supplementary material
Source: PubMed Central journal article supplement (PMC1553200)
Supplement: 7601259s2.pdf [file 7601259s2.pdf]

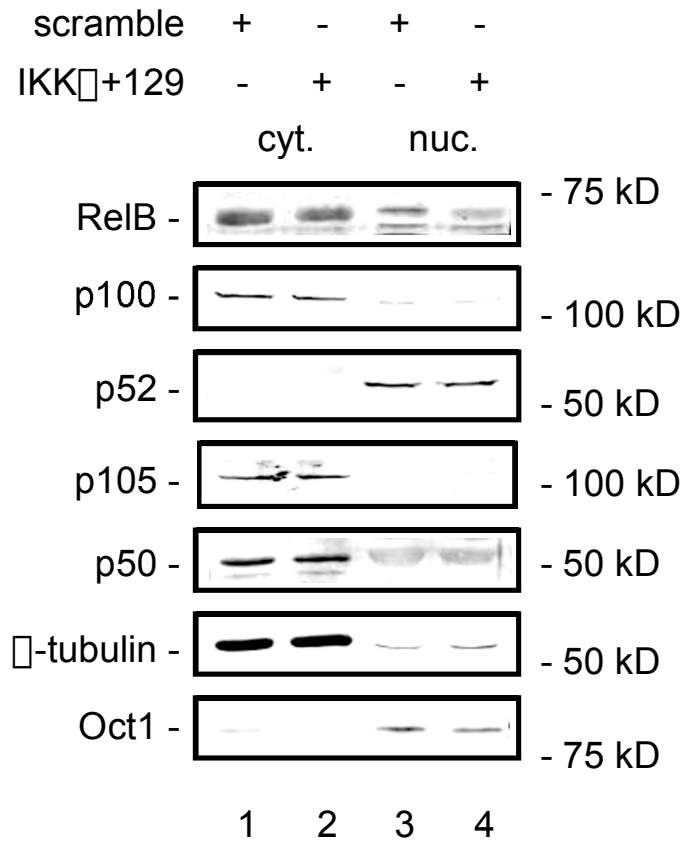

Nuclear and cytoplasmic extracts were prepared 48 hours after the transfection with the indicated siRNAs. Western blot analysis of RelB, p100, p52, p105 and p50 expression.  $\beta$ -tubulin and Oct1 controls nuclear and cytoplasmic fractionation.
