# Supplementary material
Source: PubMed Central journal article supplement (PMC1553200)
Supplement: 7601259s3.pdf [file 7601259s3.pdf]

**siRNA target sequences**

---

|                          |                             |
|--------------------------|-----------------------------|
| scramble control siRNA   | 5' AACAGTCGCGTTTGCGACTGG 3' |
| IKK $\alpha$ +81         | 5' AACGTCTGTCTGTACCAGCAT 3' |
| IKK $\alpha$ +129        | 5' AAGTCTTGTCGCCTAGAGCTA 3' |
| IKK $\alpha$ +81         | 5' AAATGTCATCCGATGGCACAA 3' |
| IKK $\alpha$ +591        | 5' AAGTACACAGTGACCGTCGAC 3' |
| p65+144                  | 5' AAGATCAATGGCTACACAGGA 3' |
| RelB+727                 | 5' AAGACTGCACCGACGGCATCT 3' |
| c-Rel+460                | 5' AAGAACGCAGACCTTTGTTTT 3' |
| p50+488                  | 5' AAGGGGCTATAATCCTGGACT 3' |
| p27 <sup>Kip1</sup> +217 | 5' AAGTACGAGTGGCAAGAGGTG 3' |
| skp2+394                 | 5' AAGGGAGTGACAAAGACTTTG 3' |
| skp2+804                 | 5' AATCTAAGCCTGGAAGGCCTG 3' |
